# Supplementary material
Source: HighWire-hosted journal article supplement (http://dmd.aspetjournals.org/highwire/filestream/75085/field_highwire_adjunct_files/1/90639_Supplemental_Table_2.xlsx)
Supplement: 90639_Supplemental_Table_2.xlsx [file 90639_Supplemental_Table_2.xlsx]

## Sheet: miRNAs targeting GSTZ1
Table S2. Identification of candidate miRNAs in the regulation of GSTZ1.
Array	miRanda	TargetScan	DIANA
hsa-miR-1180-3p	hsa-miR-124-3p	hsa-miR-1227-3p	hsa-miR-10b-5p
hsa-miR-1185-1-3p	hsa-miR-144-3p	hsa-miR-132-3p	hsa-miR-129-2-3p
hsa-miR-1185-2-3p	hsa-miR-214-3p	hsa-miR-16-1-3p	hsa-miR-1-3p
hsa-miR-127-3p	hsa-miR-328-3p	hsa-miR-1914-3p	hsa-miR-146-5p
hsa-miR-127-5p	hsa-miR-376c-3p	hsa-miR-1914-5p	hsa-miR-210-3p
hsa-miR-1301-3p	hsa-miR-377-3p	hsa-miR-208a-3p	hsa-miR-23b-3p
hsa-miR-130a-3p	hsa-miR-499-5p	hsa-miR-2116-3p	hsa-miR-300b-3p
hsa-miR-134-5p	hsa-miR-506-3p	hsa-miR-3065-5p	hsa-miR-374a-5p
hsa-miR-154-5p	hsa-miR-542-3p	hsa-miR-3180-5p	hsa-miR-429
hsa-miR-184		hsa-miR-3199	hsa-miR-4726-3p
hsa-miR-18a-5p		hsa-miR-328-3p	hsa-miR-5581-3p
hsa-miR-18b-5p		hsa-miR-3619-5p
hsa-miR-19a-3p		hsa-miR-3714
hsa-miR-297		hsa-miR-376c-3p
hsa-miR-299-3p		hsa-miR-3942-3p
hsa-miR-3135b		hsa-miR-423-5p
hsa-miR-3180		hsa-miR-4268
hsa-miR-3185		hsa-miR-4432
hsa-miR-3196		hsa-miR-4444
hsa-miR-337-5p		hsa-miR-4476
hsa-miR-370-3p		hsa-miR-4645-5p
hsa-miR-376a-3p		hsa-miR-4673
hsa-miR-376c-3p		hsa-miR-4685-5p
hsa-miR-379-5p		hsa-miR-4757-5p
hsa-miR-381-3p		hsa-miR-508-5p
hsa-miR-382-5p		hsa-miR-5189-3p
hsa-miR-409-3p		hsa-miR-532-3p
hsa-miR-409-5p		hsa-miR-539-5p
hsa-miR-411-5p		hsa-miR-577
hsa-miR-431-5p		hsa-miR-6134
hsa-miR-432-5p		hsa-miR-6511a-5p
hsa-miR-433-3p		hsa-miR-6515-3p
hsa-miR-4417		hsa-miR-663b
hsa-miR-4440		hsa-miR-6734-3p
hsa-miR-4505		hsa-miR-6738-5p
hsa-miR-4632-5p		hsa-miR-6747-3p
hsa-miR-4655-5p		hsa-miR-6772-3p
hsa-miR-4793-3p		hsa-miR-6775-3p
hsa-miR-483-3p		hsa-miR-6781-3p
hsa-miR-483-5p		hsa-miR-6837-5p
hsa-miR-485-3p		hsa-miR-6851-3p
hsa-miR-485-5p		hsa-miR-6889-3p
hsa-miR-487a-3p		hsa-miR-7113-3p
hsa-miR-487a-5p		hsa-miR-7113-5p
hsa-miR-487b-3p		hsa-miR-767-3p
hsa-miR-493-3p		hsa-miR-7854-3p
hsa-miR-5100		hsa-miR-877-3p
hsa-miR-6085
hsa-miR-6132
hsa-miR-654-3p
hsa-miR-654-5p
hsa-miR-665
hsa-miR-6726-5p
hsa-miR-6738-5p
hsa-miR-6743-5p
hsa-miR-675-3p
hsa-miR-6754-5p
hsa-miR-675-5p
hsa-miR-6787-5p
hsa-miR-6805-5p
hsa-miR-6813-5p
hsa-miR-6820-5p
hsa-miR-8063
